# Supplementary material
Source: PubMed Central journal article supplement (PMC549328)
Supplement: eukcell_4_2_455__1.pdf [file eukcell_4_2_455__1.pdf]

A

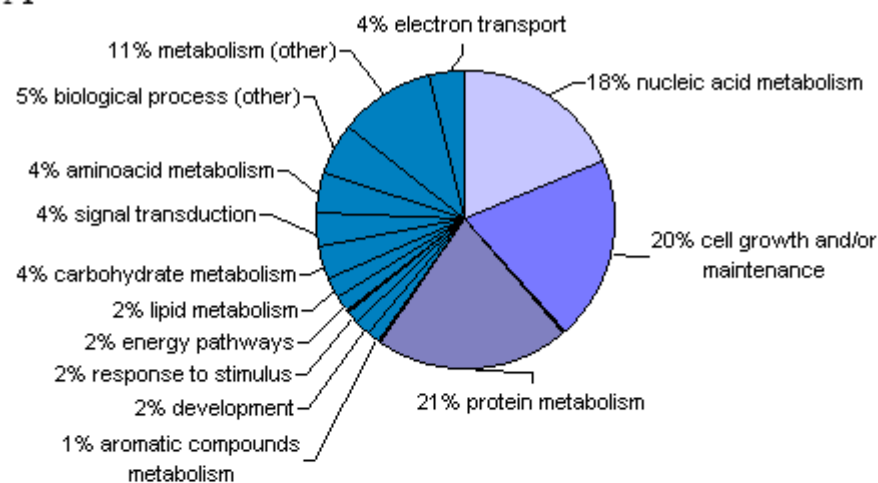

B

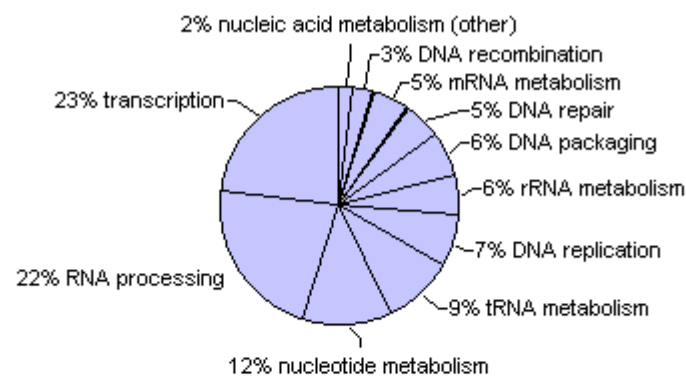

C

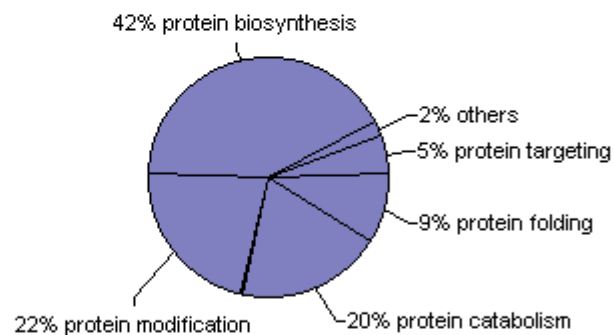

D

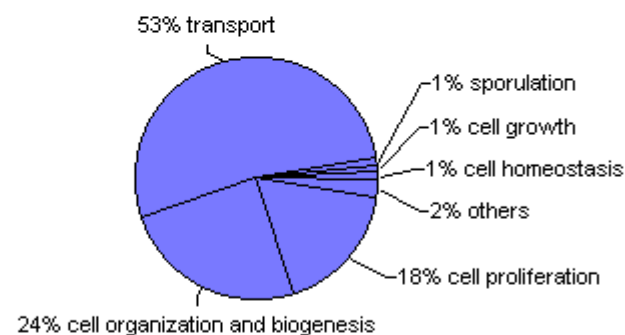

Supplementary Figure 1S. Gene Ontology classification of *B. emersonii* ESTs. (A) Percentage of *B. emersonii* ESTs in each of the biological process categories of Gene Ontology assignments. A total of 1,680 distinct ESTs were assigned to 2,604 different biological processes. (B-D) Percentage of assigned biological processes within main categories shown in (A): nucleic acid metabolism (B), protein metabolism (C), and cell growth and/or maintenance (D), respectively.
