# Supplementary material
Source: PubMed Central journal article supplement (PMC549328)
Supplement: eukcell_4_2_455__3.pdf [file eukcell_4_2_455__3.pdf]

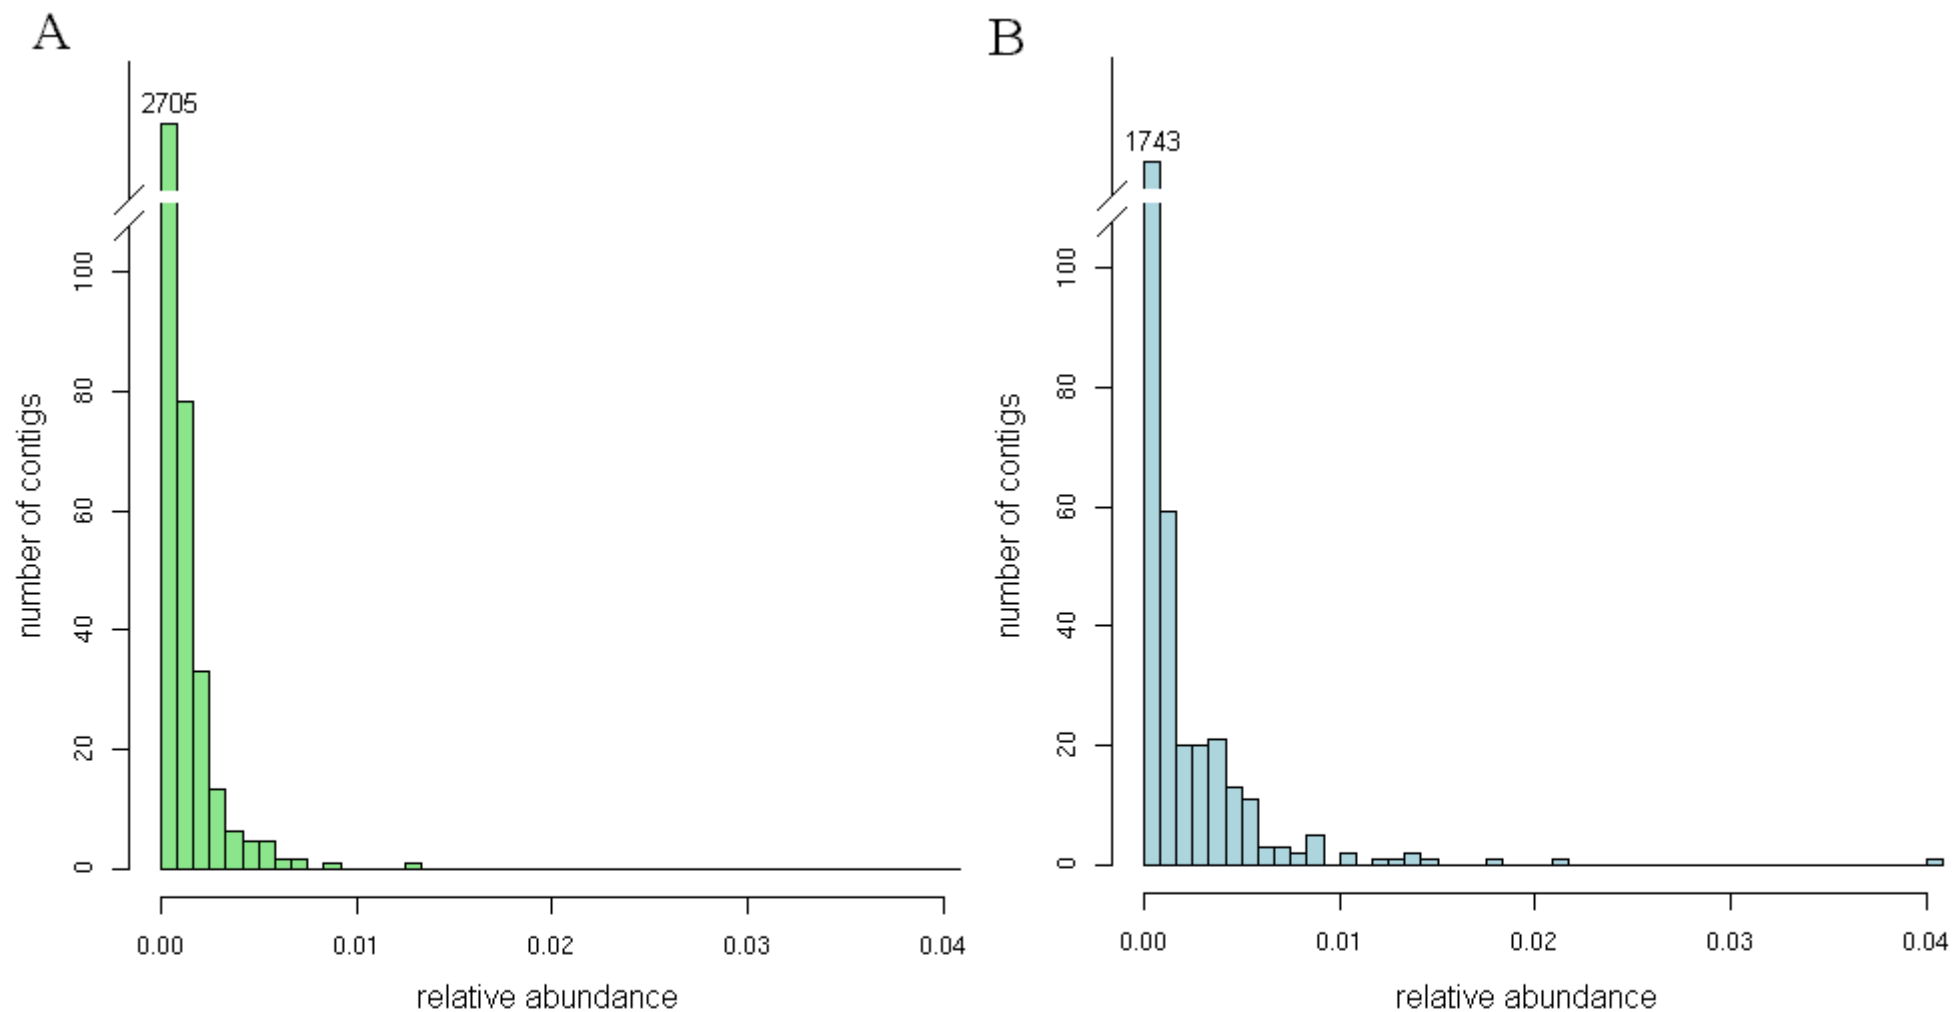

Supplementary Figure 3S. Distribution of clustered sequences from sporulation (A) and germination (B) stages of *B. emersonii* life cycle. The vertical axis of the normalized histogram shows the number of contigs. The horizontal axis shows the abundance ranges. Singlets were also considered for histogram construction. The number of contigs was normalized taking into account the total amount of accepted sequences in each developmental stage
